# Supplementary material for: Predicting the properties of a new class of host–guest complexes: C60 fullerene and CB[9] cucurbituril
Source: Royal Society of Chemistry journal article supplement (doi:10.1039/c4cp03299c), 2014-01-01
Supplement: c4cp03299c1.pdf [file c4cp03299c1.pdf]

## Supporting Material

### Predicting the properties of a new class of host-guest complexes:

#### **C<sub>60</sub> fullerene and CB[9] cucurbituril**

Eudes Fileti<sup>1</sup>, Guilherme Colherinhas<sup>2</sup> and Thaciana Malaspina<sup>1</sup>

- 1) Instituto de Ciência e Tecnologia, Universidade Federal de São Paulo, 12231-280, São José dos Campos, SP, Brazil.
- 2) Departamento de Física, CEPAE, Universidade Federal de Goiás, CP.131, 74001-970, Goiânia, GO, Brazil.

\* Corresponding author. E-mail: fileti@gmail.com, gcolherinhas@gmail.com, thaciana@unifesp.br;

Tel: +55 12 3309-9573; Fax: +55 12 3921-8857

## 1.0 – Further Computational Details

All in-water simulations were performed in the *NPT* ensemble with  $T = 298\text{ K}$  and  $P = 1\text{ atm}$ . The systems consisted of nearly 1200 (or 1400) water molecules and one  $C_{60}$  molecule (or  $C_{60}@CB[9]$  complex) in a cubic box with periodic boundary condition employing the minimum image convention.<sup>1</sup> The TIP3P potential<sup>2</sup> was used for the water molecule.  $C_{60}$  molecule was modeled using a based CHARMM36 force field adapted from Rivelino et.al.<sup>3</sup> Properties were calculated from simulations considering a time-step of 2 fs with data collected every 0.05 ps. The cubic cells were equilibrated for 1 ns and for the equilibration process we have performed a running length of 10 ns for each thermodynamical window, both in the *NPT* ensemble. The system was kept at the appropriate temperature and pressure via velocity rescaling<sup>4</sup> and Parrinello-Rahman<sup>5</sup> schemes, with a constant coupling of 0.1 and 1.0 respectively. All bond lengths were constrained via the LINCS algorithm.<sup>6</sup> A cutoff distance of 1.2 nm for LJ interaction was employed, whereas the Coulomb interactions were treated by using the PME algorithm.<sup>7</sup>

## 2.0 – PM6 molecular dynamics

The graphs of the potential energy and variation of total energy (Figure S1) confirm the stability of the semi-empirical PM6 molecular dynamics.

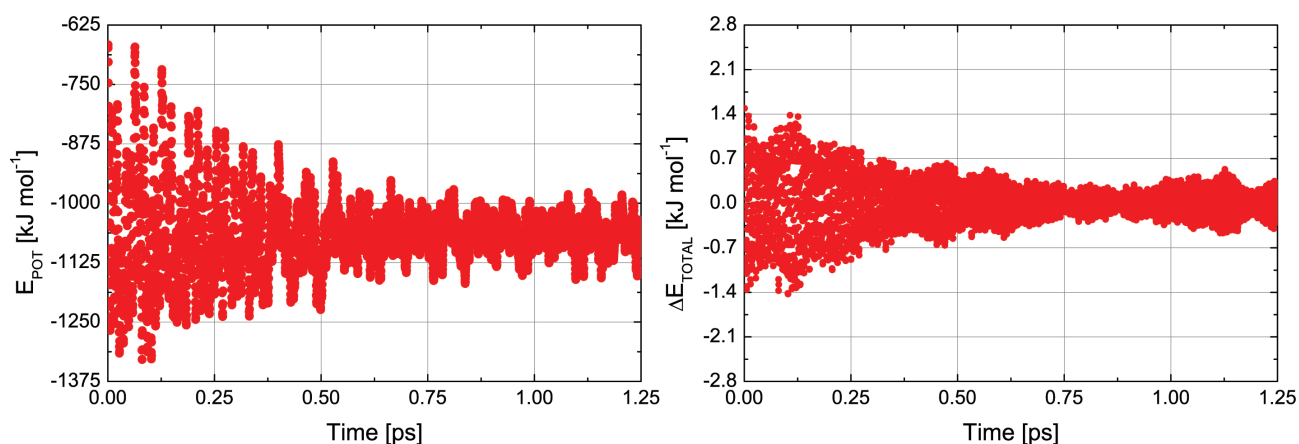

**Figure S1:** Potential energy and variation of the total energy (in  $\text{kJ mol}^{-1}$ ) as a function of time.

## 2.1 – Further structural properties

During the process of inclusion some selected geometric parameters were analyzed. We observe that the largest variation for any bond distances was only 0.0013 nm while the largest variation for any angle was  $4.1^\circ$ . This small variation between distances and angles leads to a greater change in the structure of the CB[9] as a whole. For example, consider the top diameter,  $D_A$ , (entrance door of the fullerene) and the bottom diameter,  $D_B$ , (Figure S2 for the CB[9]). We observed through the scan calculation that as the  $C_{60}$

enters into the CB[9] cavity the  $D_A$  diameter extends by 0.20 nm as the  $D_B$  diameter shortens by 0.05 nm (see Table S1).

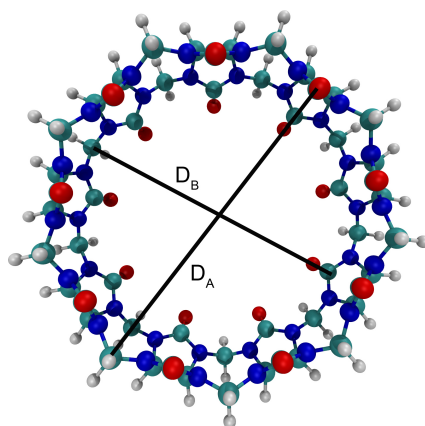

**Figure S2:** Representation of CB[9] and  $C_{60}$  diameter  $D_A$  (superior) and  $D_B$  (inferior)

|       | $\Delta R_{MAX}$ | $\Delta A_{MAX}$ | $D_A [(\Delta D_A)_{MAX}]$ | $D_B [(\Delta D_B)_{MAX}]$ |
|-------|------------------|------------------|----------------------------|----------------------------|
| CB[9] | 0.0013           | 4.1°             | 1.36 [0.20]                | 1.34 [0.05]                |
| C60   | 0.0005           | 1.1°             | 0.71 [0.0035]              | 0.71 [0.0035]              |

**Table S1:** Values PM6 for the maximum variation of bond length  $\Delta R_{MAX}$  (in nm), maximum variation of angles  $\Delta A_{MAX}$ , average diameter  $D_A$  and  $D_B$  and respective maximum variations  $(\Delta D)_{MAX}$  (in nm) for  $C_{60}@CB[9]$  complex. All results was obtained in dissociation process of  $C_{60}@CB[9]$  complex, where the centers of mass  $R_{CM}$  of each monomer was separated by 0.02 nm in a range of 0.98 nm.

Figure S3 shows this behavior as a function of distance. We can see that during inclusion, as the diameter widens (reaching its maximum value at the center-of-mass distance of 0.25 nm) is the diameter  $D_B$  shortens, about the same distance.

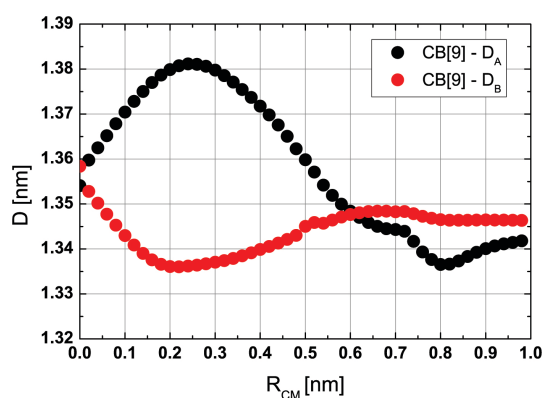

**Figure S3:** PM6 values of the average diameter  $D_A$  e  $D_B$  (in nm) of the CB[9]. The centers of mass  $R_{CM}$  of each monomer were separated by 0.02 nm in a range of 0.98 nm.

## 2.2 - Electronic Properties

As discussed in the main text, the approaching of the  $C_{60}$  to the CB[9] oxygen portals, results in a marked change of the electron cloud of the fullerene. Another indicator for this effect (beyond the induced dipole, already discussed) is the induced charge on the carbon cage. In Figure S4 we selected some atoms in different regions of  $C_{60}$  and plot the value of its charges in function of the monomers center-of-mass separation. We can see, for instance, the equatorial carbons are those with the greatest charger variation, ranging from  $-0.06e$  to  $+0.06e$  and depending on the position.

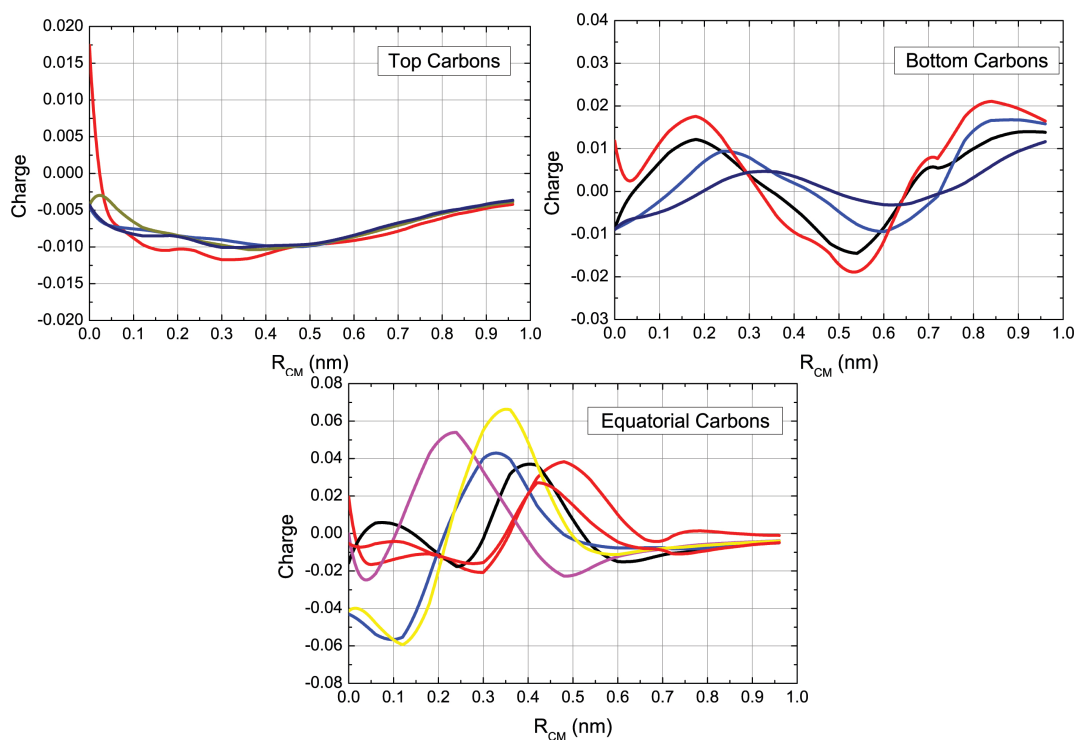

**Figure S4:** Variation of the  $\omega$ B97X-D/6-31G(d,p) Mulliken atomic charges (in elementary unit,  $e$ ) for selected carbon atoms of  $C_{60}$ . All results were obtained for the inclusion process of  $C_{60}$  into CB[9]. The center of mass distance,  $R_{CM}$ , was incremented by 0.02 nm for a range of 0.98 nm.

Another indicator to the changes in the electron cloud of the fullerene when its approaches to the hydrophilic CB[9] is showed at Figure S5. The  $\omega$ B97X-D/6-31G(d,p) results for the Mulliken atomic charges shows that there is charge transfer between the monomers during the inclusion process.

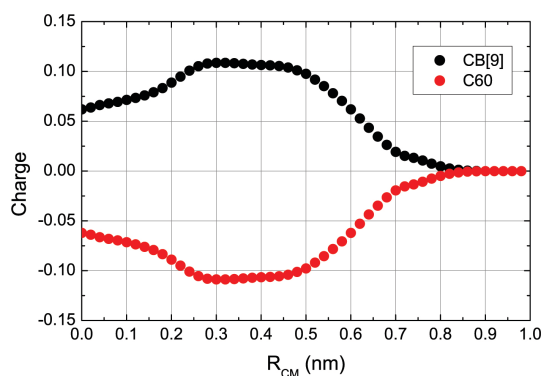



**Figure S4:** Variation of the  $\omega$ B97X-D/6-31G(d,p) Mulliken atomic charges (in elementary unit,  $e$ ) versus the distance between the center of mass of  $C_{60}$  and CB[9] during the inclusion process of  $C_{60}$  into CB[9]. The center of mass distance,  $R_{CM}$ , was incremented by 0.02 nm for a range of 0.98 nm.

## REFERENCES

1. A. Leach, *Molecular Modelling: Principles and applications*, Prentice Hall, New York, 2001.
2. W. L. Jorgensen, J. Chandrasekhar, J. D. Madura, R. W. Impey and M. L. Klein, *J. Chem. Phys.*, 1983, 79.
3. C. Maciel, E. E. Fileti and R. Rivelino, *J. Phys. Chem. B*, 2009, 113 (20), 2009, 113, 7045–7048.
4. G. Bussi, D. Donadio and M. Parrinello, *J. Chem. Phys.* 126, 2007, 126, 014101-014108.
5. M. Parrinello and A. Rahman, *J. Appl. Phys.*, 1981, 52, 7182-7192.
6. B. Hess, H. Bekker, H. J. C. Berendsen and J. G. E. M. Fraaije, *J. Comp. Chem.*, 1997, 18, 1463.
7. T. Darden, D. York and L. Pedersen, *J. Chem. Phys.*, 1993, 98, 10089-10099.
